# Supplementary material for: Sodium Tanshinone IIA Sulfonate alleviates vascular senescence in diabetic mice by modulating the A20-NFκB-NLRP3 inflammasome-catalase pathway
Source: PubMed Central journal article supplement — Sci Rep. 2024 Jul 26;14:17665. doi: 10.1038/s41598-024-68169-1 (PMC11291694; doi:10.1038/s41598-024-68169-1), 2024-07-26

The original WB gels of figure 1

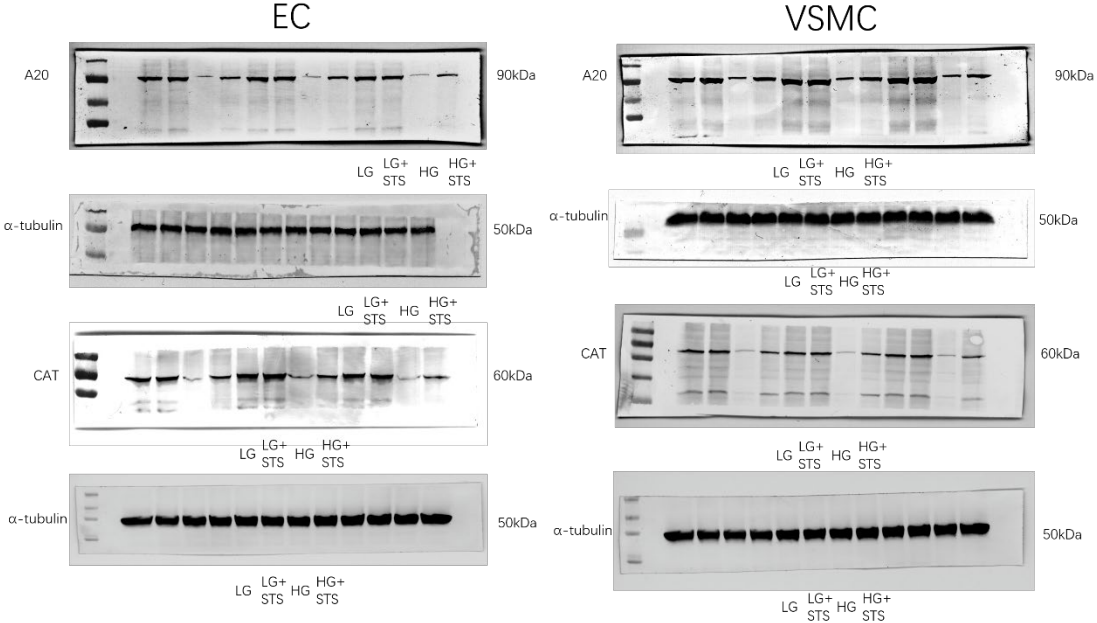

The original WB gels of figure 2

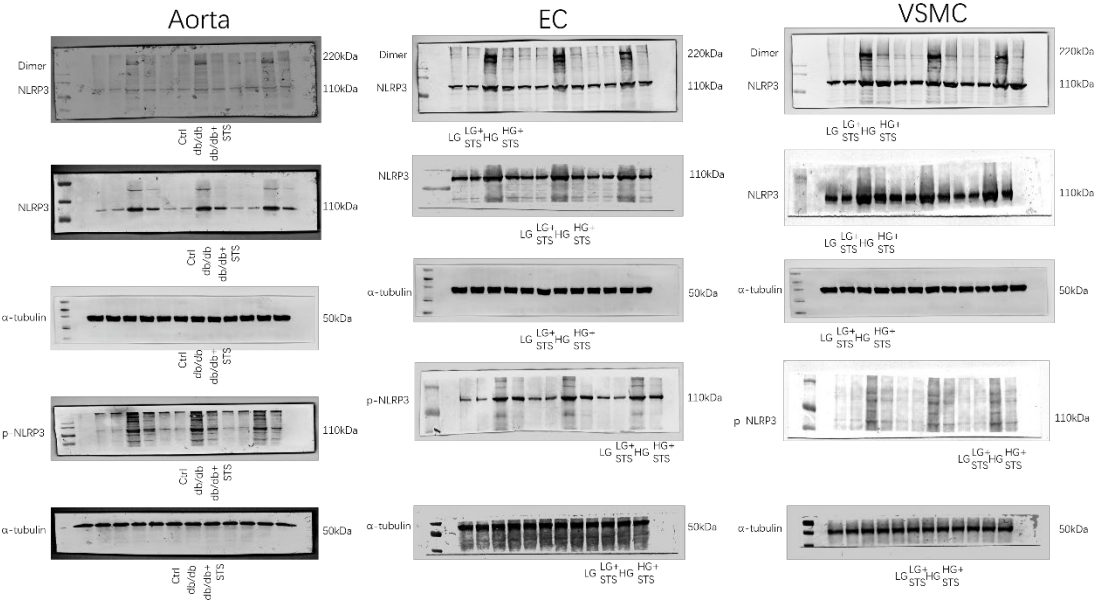

The original WB gels of figure 3

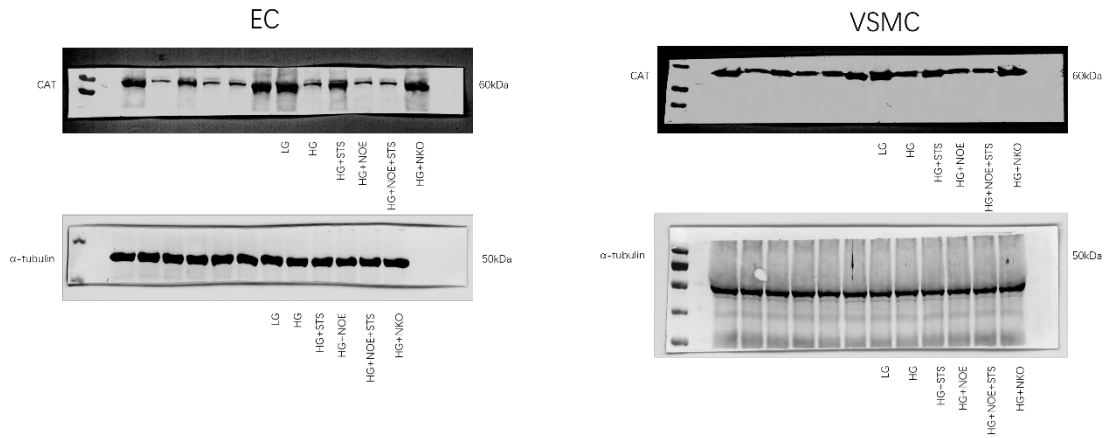

The original WB gels of figure 4

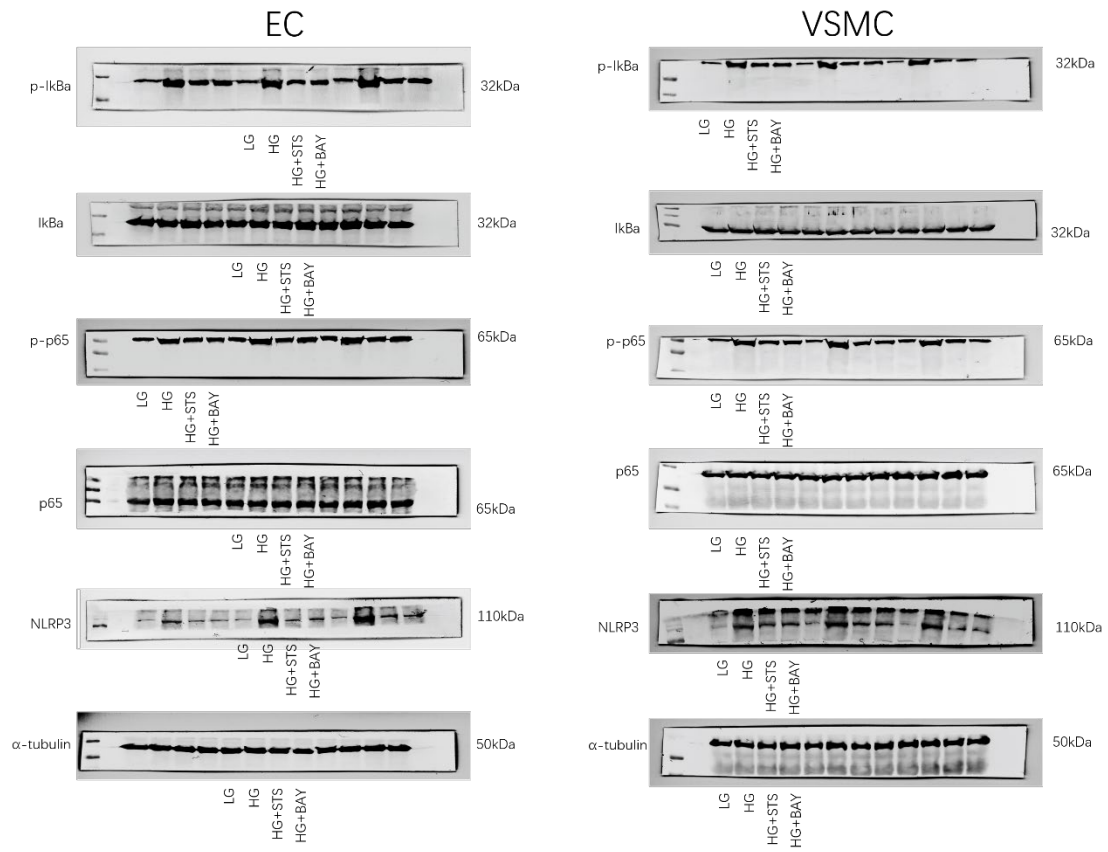



The original WB gels of supplemental figure 5

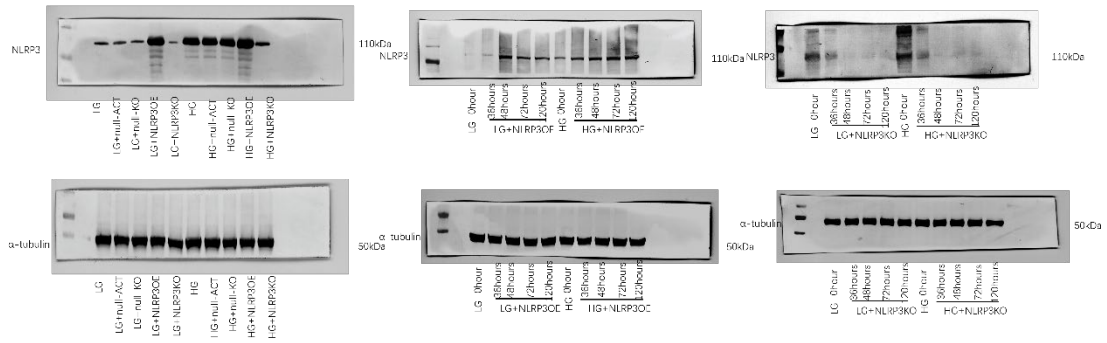

The original WB gels of supplemental figure 7

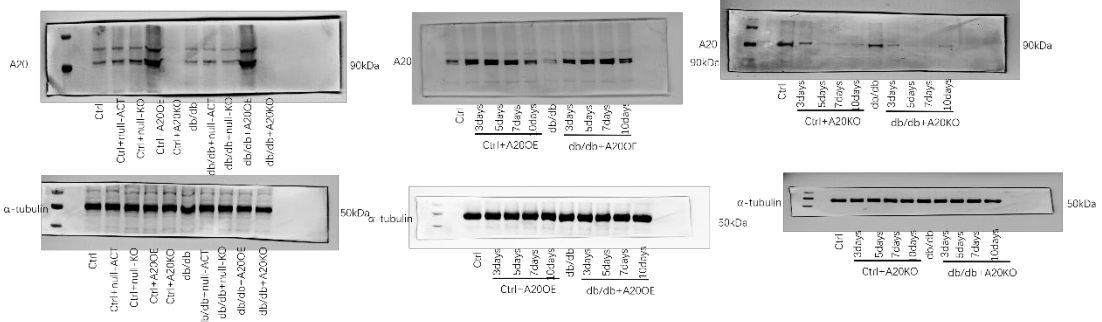

The original WB gels of supplemental figure 6

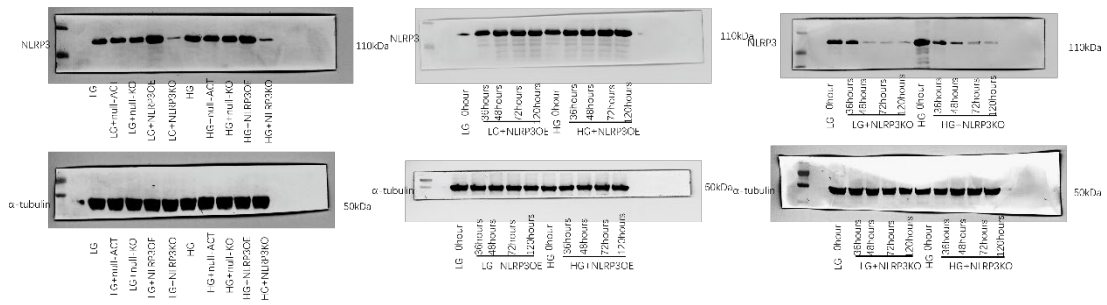

The original WB gels of supplemental figure 8

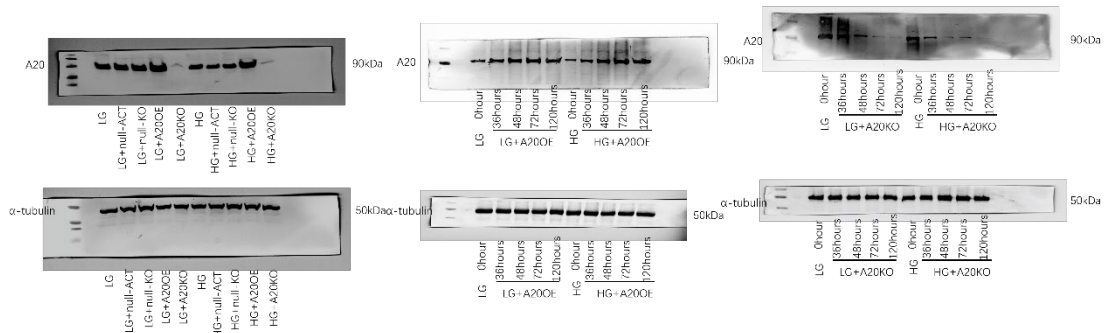

## The original WB gels of supplemental figure 9

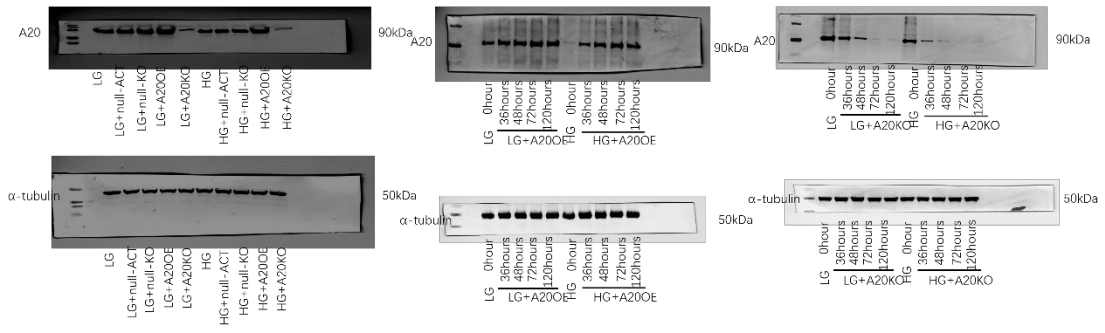

Supplement: 41598_2024_68169_MOESM10_ESM.pdf [file 41598_2024_68169_MOESM10_ESM.pdf]
